# Supplementary material
Source: PubMed Central journal article supplement (PMC5444980)
Supplement: NIHMS842706-supplement-01.pdf [file NIHMS842706-supplement-01.pdf]

**Supplemental Table 1.** Summary of subject participation at baseline, 3-7 days, 3, 6, 8, 12, 18 and 24 months

|                         |             | Base-<br>line | 3-7<br>Days | 3 months | 6 months | 9 months | 12 months | 18<br>months | 24 months |
|-------------------------|-------------|---------------|-------------|----------|----------|----------|-----------|--------------|-----------|
| EIM                     | DMD ≤7      | 18            | 5/28%       | 11/61%   | 13/72%   | 8/44%    | 11/61%    | 10/56%       | 5/28%     |
|                         | DMD >7      | 18            | 8/44%       | 10/56%   | 11/61%   | 7/39%    | 11/61%    | 9/50%        | 11/61%    |
|                         | DMD All     | 36            | 13/36%      | 21/58%   | 24/67%   | 15/42%   | 22/61%    | 19/53%       | 16/44%    |
|                         | Control ≤7  | 16            | 13/81%      | 13/81%   | 15/94%   | 11/69%   | 14/88%    | 11/69%       | 11/69%    |
|                         | Control >7  | 13            | 11/85%      | 11/85%   | 12/92%   | 13/100%  | 13/100%   | 13/100%      | 11/85%    |
|                         | Control All | 29            | 24/83%      | 24/83%   | 27/93%   | 24/83%   | 27/93%    | 24/83%       | 22/76%    |
| US-<br>GSL              | DMD ≤7      | 19            | 6/32%       | 10/53%   | 14/74%   | 8/42%    | 13/68%    | 10/53%       | 5/26%     |
|                         | DMD >7      | 16            | 8/50%       | 10/63%   | 10/63%   | 8/50%    | 9/56%     | 8/50%        | 11/69%    |
|                         | DMD All     | 35            | 14/40%      | 20/57%   | 24/69%   | 16/46%   | 22/63%    | 18/51%       | 16/46%    |
|                         | Control ≤7  | 15            | 12/80%      | 13/87%   | 14/93%   | 12/80%   | 14/93%    | 12/80%       | 11/73%    |
|                         | Control >7  | 13            | 10/77%      | 12/92%   | 12/92%   | 13/100%  | 13/100%   | 13/100%      | 12/92%    |
|                         | Control All | 28            | 22/79%      | 25/89%   | 26/93%   | 25/89%   | 27/96%    | 25/89%       | 23/82%    |
| US-<br>GSL              | DMD ≤7      | 19            | 6/32%       | 10/53%   | 14/74%   | 8/42%    | 13/68%    | 10/53%       | 5/26%     |
|                         | DMD >7      | 16            | 8/50%       | 10/63%   | 10/63%   | 8/50%    | 9/56%     | 8/50%        | 11/69%    |
|                         | DMD All     | 35            | 14/40%      | 20/57%   | 24/69%   | 16/46%   | 22/63%    | 18/51%       | 16/46%    |
|                         | Control ≤7  | 15            | 12/80%      | 13/87%   | 14/93%   | 12/80%   | 14/93%    | 12/80%       | 11/73%    |
|                         | Control >7  | 13            | 10/77%      | 12/92%   | 12/92%   | 13/100%  | 13/100%   | 13/100%      | 12/92%    |
|                         | Control All | 28            | 22/79%      | 25/89%   | 26/93%   | 25/89%   | 27/96%    | 25/89%       | 23/82%    |
| 6MWT                    | DMD ≤7      | 10            | 0/0%        | 3/30%    | 4/40%    | 2/20%    | 4/40%     | 5/50%        | 2/20%     |
|                         | DMD >7      | 6             | 1/17%       | 4/67%    | 3/50%    | 2/33%    | 3/50%     | 2/33%        | 2/33%     |
|                         | DMD All     | 16            | 1/6%        | 7/44%    | 7/44%    | 4/25%    | 7/44%     | 7/44%        | 4/25%     |
|                         | Control ≤7  | 11            | 0/0%        | 8/73%    | 9/82%    | 6/55%    | 10/91%    | 9/82%        | 9/82%     |
|                         | Control >7  | 13            | 1/8%        | 11/85%   | 11/85%   | 10/77%   | 8/62%     | 9/69%        | 12/92%    |
|                         | Control All | 24            | 1/4%        | 19/79%   | 20/83%   | 16/67%   | 18/75%    | 18/75%       | 21/88%    |
| Supine-<br>To-<br>Stand | DMD ≤7      | 16            | 0/0%        | 8/50%    | 10/63%   | 7/44%    | 10/63%    | 8/50%        | 3/19%     |
|                         | DMD >7      | 7             | 1/14%       | 5/71%    | 3/43%    | 3/43%    | 4/57%     | 3/43%        | 2/29%     |
|                         | DMD All     | 23            | 1/4%        | 13/57%   | 13/57%   | 10/43%   | 14/61%    | 11/48%       | 5/22%     |
|                         | Control ≤7  | 15            | 0/0%        | 12/80%   | 13/87%   | 10/67%   | 12/80%    | 12/80%       | 10/67%    |
|                         | Control >7  | 13            | 1/8%        | 11/85%   | 11/85%   | 10/77%   | 8/62%     | 11/85%       | 12/92%    |
|                         | Control All | 28            | 1/4%        | 23/82%   | 24/86%   | 20/71%   | 20/71%    | 23/82%       | 22/79%    |

Number of subjects at each visit/percentage of baseline subjects

Supplemental Table 2. Full Data Set

| Older Boys<br>100/300 Phase<br>Ratio*         | 6 months            |              |                       | 9 months            |                            |                        | 12 months           |                                |                        | 18 months           |                            |                        | 24 months           |                            |                        |
|-----------------------------------------------|---------------------|--------------|-----------------------|---------------------|----------------------------|------------------------|---------------------|--------------------------------|------------------------|---------------------|----------------------------|------------------------|---------------------|----------------------------|------------------------|
|                                               | Slope<br>Difference | p-value      | 95%CI                 | Slope<br>Difference | p-value                    | 95%CI                  | Slope<br>Difference | p-value                        | 95%CI                  | Slope<br>Difference | p-value                    | 95%CI                  | Slope<br>Difference | p-value                    | 95%CI                  |
| Deltoid                                       | -0.0678             | 0.10         | [0.013,-0.15]         | <b>-0.076</b>       | <b>0.028</b>               | <b>[-0.009,-0.14]</b>  | -0.031              | 0.178                          | [0.014,-0.076]         | <b>-0.043</b>       | <b>0.011<sup>§</sup></b>   | <b>[-0.012,-0.074]</b> | <b>-0.042</b>       | <b>0.00070<sup>§</sup></b> | <b>[-0.02,-0.064]</b>  |
| Biceps                                        | -0.073              | 0.14         | [0.021,-0.17]         | <b>-0.081</b>       | <b>0.0077<sup>§</sup></b>  | <b>[-0.024,-0.14]</b>  | <b>-0.051</b>       | <b>0.013</b>                   | <b>[-0.012,-0.09]</b>  | <b>-0.050</b>       | <b>0.002<sup>§</sup></b>   | <b>[-0.021,-0.079]</b> | <b>-0.044</b>       | <b>0.0011<sup>§</sup></b>  | <b>[-0.02,-0.068]</b>  |
| Forearm flexors<br>Upper extremity<br>average | <b>-0.10</b>        | <b>0.017</b> | <b>[-0.018,-0.18]</b> | <b>-0.11</b>        | <b>0.00040<sup>§</sup></b> | <b>[-0.051,-0.17]</b>  | <b>-0.080</b>       | <b>&lt;0.00010<sup>§</sup></b> | <b>[-0.047,-0.11]</b>  | <b>-0.061</b>       | <b>0.00010<sup>§</sup></b> | <b>[-0.034,-0.088]</b> | <b>-0.061</b>       | <b>0.00020<sup>§</sup></b> | <b>[-0.034,-0.088]</b> |
| Quadriceps                                    | -0.023              | 0.51         | [0.046,-0.092]        | -0.021              | 0.38                       | [0.024,-0.066]         | -0.0038             | 0.84                           | [0.031,-0.039]         | 0.0006              | 0.97                       | [-0.035,0.036]         | -0.0097             | 0.44                       | [0.016,-0.035]         |
| Tibialis anterior                             | 0.024               | 0.59         | [-0.062,0.11]         | -0.0041             | 0.88                       | [0.047,-0.055]         | 0.014               | 0.51                           | [-0.025,0.053]         | -0.0171             | 0.34                       | [0.018,-0.052]         | <b>-0.040</b>       | <b>0.0067%</b>             | <b>[-0.013,-0.067]</b> |
| Gastrocnemius<br>Lower extremity<br>average   | -0.064              | 0.25         | [0.044,-0.17]         | -0.020              | 0.59                       | [0.051,-0.091]         | -0.024              | 0.34                           | [0.027,-0.075]         | -0.015              | 0.52                       | [0.028,-0.058]         | -0.029              | 0.099                      | [0.004,-0.062]         |
| Six-muscle<br>average                         | -0.029              | 0.38         | [0.036,-0.094]        | -0.024              | 0.25                       | [0.017,-0.065]         | -0.0059             | 0.72                           | [0.025,-0.037]         | -0.015              | 0.33                       | [0.014,-0.044]         | <b>-0.028</b>       | <b>0.026</b>               | <b>[-0.004,-0.052]</b> |
|                                               | -0.052              | 0.055        | [-0.001,-0.10]        | <b>-0.051</b>       | <b>0.0073<sup>§</sup></b>  | <b>[-0.016,-0.086]</b> | <b>-0.029</b>       | <b>0.041</b>                   | <b>[-0.002,-0.056]</b> | <b>-0.033</b>       | <b>0.020</b>               | <b>[-0.008,-0.058]</b> | <b>-0.038</b>       | <b>0.00030%</b>            | <b>[-0.019,-0.057]</b> |
| <b>Older Boys<br/>Phase Slope<sup>†</sup></b> |                     |              |                       |                     |                            |                        |                     |                                |                        |                     |                            |                        |                     |                            |                        |
| Deltoid                                       | 0.097               | 0.68         | [-0.35,0.55]          | 0.19                | 0.30                       | [-0.16,0.54]           | 0.15                | 0.18                           | [-0.066,0.37]          | 0.14                | 0.11                       | [-0.032,0.31]          | 0.13                | 0.054                      | [0.003,0.26]           |
| Biceps                                        | -0.041              | 0.90         | [0.63,-0.71]          | 0.13                | 0.50                       | [-0.24,0.50]           | 0.12                | 0.32                           | [-0.12,0.36]           | 0.13                | 0.18                       | [-0.062,0.32]          | 0.11                | 0.14                       | [-0.033,0.25]          |
| Forearm flexors<br>Upper extremity<br>average | 0.22                | 0.45         | [-0.35,0.79]          | 0.27                | 0.18                       | [-0.12,0.66]           | <b>0.25</b>         | <b>0.030</b>                   | <b>[0.034,0.47]</b>    | <b>0.24</b>         | <b>0.0023<sup>§</sup></b>  | <b>[0.095,0.39]</b>    | <b>0.24</b>         | <b>0.00080<sup>§</sup></b> | <b>[0.11,0.37]</b>     |
| Quadriceps                                    | 0.069               | 0.77         | [-0.40,0.54]          | 0.19                | 0.23                       | [-0.10,0.48]           | 0.16                | 0.068                          | [-0.012,0.33]          | <b>0.16</b>         | <b>0.026</b>               | <b>[0.021,0.30]</b>    | <b>0.16</b>         | <b>0.0082<sup>§</sup></b>  | <b>[0.046,0.27]</b>    |
| Quadriceps                                    | -0.076              | 0.65         | [0.26,-0.41]          | -0.078              | 0.50                       | [0.14,-0.29]           | -0.13               | 0.10                           | [0.021,-0.28]          | -0.069              | 0.33                       | [0.07,-0.21]           | -0.0045             | 0.93                       | [0.10,-0.11]           |
| Tibialis anterior                             | -0.29               | 0.43         | [0.42,-1.00]          | -0.34               | 0.12                       | [0.072,-0.75]          | -0.27               | 0.11                           | [0.044,-0.58]          | 0.0076              | 0.95                       | [-0.25,0.26]           | 0.081               | 0.42                       | [-0.11,0.27]           |
| Gastrocnemius<br>Lower extremity<br>average   | 0.17                | 0.59         | [-0.46,0.80]          | 0.035               | 0.86                       | [-0.36,0.43]           | -0.020              | 0.86                           | [0.20,-0.24]           | -0.060              | 0.48                       | [0.11,-0.23]           | 0.0028              | 0.97                       | [-0.13,0.13]           |
| Six-muscle<br>average                         | -0.034              | 0.88         | [0.40,-0.47]          | -0.079              | 0.55                       | [0.18,-0.33]           | -0.12               | 0.17                           | [0.045,-0.29]          | -0.030              | 0.68                       | [0.11,-0.17]           | 0.037               | 0.50                       | [-0.071,0.15]          |
|                                               | 0.015               | 0.94         | [-0.40,0.43]          | 0.057               | 0.68                       | [-0.21,0.33]           | 0.044               | 0.59                           | [-0.12,0.20]           | 0.076               | 0.25                       | [-0.051,0.20]          | 0.091               | 0.086                      | [-0.011,0.19]          |
| <b>Younger Boys<br/>100/300Phase Ratio*</b>   |                     |              |                       |                     |                            |                        |                     |                                |                        |                     |                            |                        |                     |                            |                        |
| Deltoid                                       | -0.0021             | 0.96         | [0.072,-0.077]        | 0.0030              | 0.93                       | [-0.06,0.066]          | 0.0061              | 0.78                           | [-0.037,0.049]         | -0.0095             | 0.56                       | [0.022,-0.041]         | -0.012              | 0.32                       | [0.012,-0.036]         |
| Biceps                                        | 0.040               | 0.38         | [-0.046,0.13]         | 0.0099              | 0.73                       | [-0.045,0.065]         | 0.012               | 0.53                           | [-0.025,0.049]         | 0.016               | 0.29                       | [-0.013,0.045]         | 0.0090              | 0.49                       | [-0.016,0.034]         |
| Forearm flexors<br>Upper extremity<br>average | -0.016              | 0.68         | [0.058,-0.09]         | 0.0043              | 0.88                       | [-0.051,0.059]         | 0.0064              | 0.69                           | [-0.025,0.038]         | 0.0059              | 0.67                       | [-0.022,0.033]         | 0.0020              | 0.89                       | [-0.025,0.029]         |
|                                               | 0.012               | 0.68         | [-0.045,0.069]        | 0.0096              | 0.67                       | [-0.034,0.053]         | 0.013               | 0.39                           | [-0.018,0.044]         | -0.00020            | 0.99                       | [0.025,-0.026]         | -0.0057             | 0.58                       | [0.016,-0.027]         |

|                                               |              |                            |                       |              |              |                       |              |              |                       |              |              |                       |         |       |                |
|-----------------------------------------------|--------------|----------------------------|-----------------------|--------------|--------------|-----------------------|--------------|--------------|-----------------------|--------------|--------------|-----------------------|---------|-------|----------------|
| Quadriceps                                    | 0.030        | 0.36                       | [-0.033,0.093]        | 0.030        | 0.19         | [-0.013,0.073]        | 0.016        | 0.36         | [-0.017,0.049]        | 0.023        | 0.19         | [-0.01,0.056]         | 0.0051  | 0.70  | [-0.02,0.031]  |
| Tibialis anterior                             | 0.020        | 0.61                       | [-0.054,0.094]        | 0.0097       | 0.69         | [-0.037,0.057]        | 0.0060       | 0.76         | [-0.033,0.045]        | 0.011        | 0.54         | [-0.024,0.046]        | 0.00060 | 0.97  | [-0.029,0.03]  |
| Gastrocnemius<br>Lower extremity<br>average   | 0.097        | 0.061                      | [-0.003,0.20]         | 0.059        | 0.088        | [-0.008,0.13]         | 0.043        | 0.090        | [-0.006,0.092]        | 0.039        | 0.092        | [-0.006,0.084]        | 0.0093  | 0.61  | [-0.026,0.045] |
| Six Muscle<br>Average                         | 0.041        | 0.18                       | [-0.018,0.1]          | 0.030        | 0.14         | [-0.009,0.069]        | 0.024        | 0.14         | [-0.007,0.055]        | 0.021        | 0.17         | [-0.008,0.05]         | 0.0047  | 0.71  | [-0.021,0.03]  |
| <b>Younger Boys<br/>Phase Slope†</b>          |              |                            |                       |              |              |                       |              |              |                       |              |              |                       |         |       |                |
| Deltoid                                       | -0.20        | 0.37                       | [0.23,-0.63]          | -0.15        | 0.40         | [0.18,-0.48]          | 0.017        | 0.87         | [-0.18,0.21]          | 0.086        | 0.33         | [-0.085,0.26]         | 0.10    | 0.15  | [-0.037,0.24]  |
| Biceps                                        | -0.34        | 0.28                       | [0.27,-0.95]          | -0.081       | 0.66         | [0.27,-0.43]          | -0.072       | 0.56         | [0.16,-0.31]          | -0.048       | 0.62         | [0.15,-0.24]          | 0.044   | 0.57  | [-0.11,0.20]   |
| Forearm flexors<br>Upper extremity<br>average | -0.15        | 0.56                       | [0.36,-0.66]          | -0.12        | 0.51         | [0.25,-0.49]          | 0.0049       | 0.96         | [-0.21,0.22]          | 0.044        | 0.55         | [-0.10,0.19]          | 0.090   | 0.22  | [-0.053,0.23]  |
| Quadriceps                                    | -0.27        | 0.22                       | [0.16,-0.70]          | -0.16        | 0.30         | [0.13,-0.45]          | -0.039       | 0.66         | [0.13,-0.21]          | 0.043        | 0.54         | [-0.094,0.18]         | 0.10    | 0.090 | [-0.02,0.22]   |
| Quadriceps                                    | -0.17        | 0.27                       | [0.12,-0.46]          | -0.15        | 0.18         | [0.066,-0.37]         | -0.086       | 0.25         | [0.057,-0.23]         | -0.067       | 0.35         | [0.07,-0.20]          | 0.016   | 0.78  | [-0.098,0.13]  |
| Tibialis anterior                             | -0.53        | 0.11                       | [0.097,-1.16]         | -0.28        | 0.16         | [0.092,-0.65]         | -0.11        | 0.49         | [0.20,-0.42]          | -0.091       | 0.49         | [0.16,-0.35]          | -0.016  | 0.87  | [0.18,-0.21]   |
| Gastrocnemius<br>Lower extremity<br>average   | <b>-0.83</b> | <b>0.0068</b> <sup>§</sup> | <b>[-0.26,-1.40]</b>  | <b>-0.42</b> | <b>0.026</b> | <b>[-0.067,-0.77]</b> | <b>-0.24</b> | <b>0.032</b> | <b>[-0.024,-0.46]</b> | <b>-0.18</b> | <b>0.044</b> | <b>[-0.006,-0.35]</b> | -0.042  | 0.56  | [0.097,-0.18]  |
| Six Muscle<br>Average                         | -0.48        | <b>0.021</b>               | <b>[-0.088,-0.87]</b> | <b>-0.28</b> | <b>0.035</b> | <b>[-0.025,-0.54]</b> | -0.16        | 0.063        | [-0.001,-0.32]        | -0.10        | 0.15         | [0.037,-0.24]         | -0.013  | 0.82  | [0.10,-0.13]   |
| Six Muscle<br>Average                         | -0.38        | 0.063                      | [0.012,-0.77]         | -0.23        | 0.091        | [0.025,-0.49]         | -0.096       | 0.24         | [0.061,-0.25]         | -0.031       | 0.63         | [0.094,-0.16]         | 0.042   | 0.44  | [-0.064,0.15]  |

Significant values are in **bold** font; Slope difference refers to the difference (DMD-control) in the slope of a given parameter over time

\*units are (months-1) † Deg-kHz<sup>-1</sup>-month<sup>-1</sup>; Values are mean (standard ± error); § FDR q-value < 0.
